# Supplementary material for: Screening of Worldwide Barley Collection for Drought Tolerance: The Assessment of Various Physiological Measures as the Selection Criteria
Source: Front Plant Sci. 2020 Jul 29;11:1159. doi: 10.3389/fpls.2020.01159 (PMC7403471; doi:10.3389/fpls.2020.01159)
Supplement: Supplemental Table S1 — Barley accessions used for screening of drought tolerance in this study. [file Table_1.xlsx]

## Sheet: Barley accessions for screening
Accession number	Accession name	Scientific name	Biological status	Country of origin
C1	Ntesaki Nijo 9	Hordeum vulgare L.	Modern Cultivar	Japan
C2	Magnum	Hordeum vulgare L.	Modern Cultivar	Syria
C3	Nawan 308	Hordeum vulgare L.	Modern Cultivar	Hungary
C4	Sikhod-Ruden	Hordeum vulgare L.	Modern Cultivar	Japan
C5	West Canada 3	Hordeum vulgare L.	Modern Cultivar	Canada
C6	Mushigang 3	Hordeum vulgare L.	Landrace	China
C7	Albania	Hordeum vulgare L.	Landrace	Albania
C8	Hagane Ōmugi	Hordeum vulgare L.	Landrace	Japan
C9	Canada 3119	Hordeum vulgare L.	Landrace	Canada
C10	Ningyueliuleng	Hordeum vulgare L.	Landrace	North Korea
C11	Akashin Riki	Hordeum vulgare L.	Modern Cultivar	Japan
C12	ABYN-HJAC4215	Hordeum vulgare L.	Breeding/research material	Mexico
C13	Alpha	Hordeum vulgare L.	Modern Cultivar	France
C14	Antoninski Browarny	Hordeum vulgare L.	Modern Cultivar	Poland
C15	Georgie	Hordeum vulgare L.	Modern Cultivar	France
C16	Hatvani 308	Hordeum vulgare L.	Modern Cultivar	Hungary
C17	Ida	Hordeum vulgare L.	Modern Cultivar	Sweden
C18	Loeal	Hordeum vulgare L.	Modern Cultivar	Afghanistan
C19	Maris otter	Hordeum vulgare L.	Modern Cultivar	UK
C20	Menuet	Hordeum vulgare L.	Modern Cultivar	France
C21	Minak	Hordeum vulgare L.	Modern Cultivar	UK
C22	Miranda	Hordeum vulgare L.	Modern Cultivar	France
C23	Mona	Hordeum vulgare L.	Modern Cultivar	Sweden
C24	Nordgol-kristna.Ca49201	Hordeum vulgare L.	Modern Cultivar	Syria
C25	Prior	Hordeum vulgare L.	Modern Cultivar	Australia
C26	Ridawn	Hordeum vulgare L.	Modern Cultivar	USA
C27	Rihane"S"	Hordeum vulgare L.	Modern Cultivar	Syria
C28	Safir	Hordeum vulgare L.	Modern Cultivar	Czechoslovakia
C29	Saga	Hordeum vulgare L.	Modern Cultivar	USA
C30	Seijo 17	Hordeum vulgare L.	Modern Cultivar	Japan
C31	Teran 78	Hordeum vulgare L.	Modern Cultivar	Ecuador
C32	Tyra	Hordeum vulgare L.	Modern Cultivar	Denmark
C33	Union	Hordeum vulgare L.	Modern Cultivar	Mexico
C34	Weeah	Hordeum vulgare L.	Modern Cultivar	Australia
C35	Welam	Hordeum vulgare L.	Modern Cultivar	Sweden
C36	Zephyr	Hordeum vulgare L.	Modern Cultivar	USA
C37	Apizaco	Hordeum vulgare L.	Modern Cultivar	Mexico
C38	Atlas 68	Hordeum vulgare L.	Modern Cultivar	USA
C39	AZ	Hordeum vulgare L.	Modern Cultivar	USA
C40	Bovanya	Hordeum vulgare L.	Modern Cultivar	Canada
C41	Centinele	Hordeum vulgare L.	Modern Cultivar	Mexico
C42	Cerro Prieto	Hordeum vulgare L.	Modern Cultivar	Mexico
C43	Rihane	Hordeum vulgare L.	Modern Cultivar	Syria
C44	Badia	Hordeum vulgare L.	Modern Cultivar	Syria
C45	Kirki	Hordeum vulgare L.	Modern Cultivar	Syria
C46	Nacha 2	Hordeum vulgare L.	Modern Cultivar	Syria
C47	Luodaozhuangdamai	Hordeum vulgare L.	Landrace	China
C48	Linhailuodamai	Hordeum vulgare L.	Landrace	China
C49	Quexin	Hordeum vulgare L.	Landrace	China
C50	Pidanglan	Hordeum vulgare L.	Landrace	China
C51	Xigaguona	Hordeum vulgare L.	Landrace	China
C52	Qubulan	Hordeum vulgare L.	Landrace	China
C53	Yousong	Hordeum vulgare L.	Landrace	China
C54	Dingjiemuzi	Hordeum vulgare L.	Landrace	China
C55	Chunpi	Hordeum vulgare L.	Landrace	China
C56	Xiongmalan	Hordeum vulgare L.	Landrace	China
C57	Xisuiduanmang	Hordeum vulgare L.	Landrace	China
C58	Goumangzi	Hordeum vulgare L.	Landrace	China
C59	Lanqingke	Hordeum vulgare L.	Landrace	China
C60	JiangsuYuanmai58	Hordeum vulgare L.	Modern Cultivar	China
C61	Ridaduo	Hordeum vulgare L.	Landrace	China
C62	Zumuzudatouliuleng	Hordeum vulgare L.	Landrace	China
C63	Pidamai	Hordeum vulgare L.	Landrace	China
C64	Landamai	Hordeum vulgare L.	Landrace	China
C65	Helindamai	Hordeum vulgare L.	Landrace	China
C66	Wenxing 1	Hordeum vulgare L.	Landrace	China
C67	Gujindamai	Hordeum vulgare L.	Landrace	China
C68	Shuangliudamai	Hordeum vulgare L.	Landrace	China
C69	Eryuehuang	Hordeum vulgare L.	Landrace	China
C70	Changmaodamai	Hordeum vulgare L.	Landrace	China
C71	Guangmanghuangdamai	Hordeum vulgare L.	Landrace	China
C72	Zhudamai 7	Hordeum vulgare L.	Modern Cultivar	China
C73	Zhudamai 998	Hordeum vulgare L.	Modern Cultivar	China
C74	Chunannongpimai 1	Hordeum vulgare L.	Modern Cultivar	China
C75	Yangnongpi 8	Hordeum vulgare L.	Modern Cultivar	China
C76	Zhepi 9	Hordeum vulgare L.	Modern Cultivar	China
C77	Yunpi 15	Hordeum vulgare L.	Modern Cultivar	China
C78	Yan 05028	Hordeum vulgare L.	Modern Cultivar	China
C79	Yangnongpi 10	Hordeum vulgare L.	Modern Cultivar	China
C80	Edamai 934	Hordeum vulgare L.	Modern Cultivar	China
C81	Fengdamai 7	Hordeum vulgare L.	Modern Cultivar	China
C82	Baodamai 13	Hordeum vulgare L.	Modern Cultivar	China
C83	S-500	Hordeum vulgare L.	Breeding/research material	Mexico
C84	Huadamai 12	Hordeum vulgare L.	Modern Cultivar	China
C85	Yunsimai 1	Hordeum vulgare L.	Modern Cultivar	China
C86	Yan 04234	Hordeum vulgare L.	Modern Cultivar	China
C87	Supi 3	Hordeum vulgare L.	Modern Cultivar	China
C88	Yunpi 11	Hordeum vulgare L.	Modern Cultivar	China
C89	Pudamai 9	Hordeum vulgare L.	Modern Cultivar	China
C90	Zhepi 10	Hordeum vulgare L.	Modern Cultivar	China
C91	Victoria/Mal1-4-3094-2	Hordeum vulgare L.	Breeding/research material	Syria
C92	Coss/OWB71080-44-1H/3/Alpha//Sul/Nacta	Hordeum vulgare L.	Breeding/research material	Turkey
C93	Alpha/Durra//SLB47-81	Hordeum vulgare L.	Breeding/research material	Syria
C94	Kc/MullersHeydla//Sls/3/GkOmega	Hordeum vulgare L.	Breeding/research material	Syria
C95	Roho/Masurka//ICB-103020/3/Kc/MullersHeydla//Sls	Hordeum vulgare L.	Breeding/research material	Syria
C96	Pamir-036/Victoria	Hordeum vulgare L.	Breeding/research material	Syria
C97	Plaisant/Radical	Hordeum vulgare L.	Breeding/research material	Syria
C98	ChiCm/An57//Albert/3/ICB-102379/4/GkOmega	Hordeum vulgare L.	Breeding/research material	Syria
C99	A109-SA-706-79//4341N/Ot/3/Roho//Alger/Ceres362-1-1	Hordeum vulgare L.	Breeding/research material	Syria
C100	CWB117-77-9-7//Alpha/Durra(TH)	Hordeum vulgare L.	Breeding/research material	Syria
C101	Alanda-01/5/CI01021/4/CM67/U.Sask.1800//Pro/CM67/3/DL70/6/Alanda/Hamra	Hordeum vulgare L.	Breeding/research material	Syria
C102	CANELA/GOB//ALELI	Hordeum vulgare L.	Breeding/research material	Mexico
C103	Soufara-02/3/RM1508/Por//WI2269/4/Hml-02/ArabiAbiad//ER/Apm	Hordeum vulgare L.	Breeding/research material	Syria
C104	Onslow/Arda	Hordeum vulgare L.	Breeding/research material	Syria
C105	ALPHA-BAR/DURRA//CORACLE/3/ALELI/4/ZHEDAR#2/5/CANELA	Hordeum vulgare L.	Breeding/research material	Syria
C106	Clipper/Volla/3/Arr/Esp//Alger/Ceres362-1-1/4/Tipper	Hordeum vulgare L.	Breeding/research material	Syria
C107	Carina/WI2291	Hordeum vulgare L.	Breeding/research material	Syria
C108	ER/Apm	Hordeum vulgare L.	Breeding/research material	Syria
C109	Tipper/Moroc9-75	Hordeum vulgare L.	Breeding/research material	Syria
C110	Palo Santo"s"	Hordeum vulgare L.	Modern Cultivar	Syria
C111	Xindeng Mongol Buudai	Hordeum vulgare L.	Landrace	Mongolia
C112	Kashima Ōmugi	Hordeum vulgare L.	Modern Cultivar	Japan
C113	Zhejiangfu	Hordeum vulgare L.	Modern Cultivar	China
C114	Feizaki 210	Hordeum vulgare L.	Modern Cultivar	Japan
C115	Wumangliuleng	Hordeum vulgare L.	Landrace	China
C116	Rudong 3 xuan	Hordeum vulgare L.	Modern Cultivar	China
C117	Hongguangerleng	Hordeum vulgare L.	Landrace	China
C118	Ganpi 1	Hordeum vulgare L.	Modern Cultivar	China
C119	CM72	Hordeum vulgare L.	Modern Cultivar	USA
C120	Gairdner	Hordeum vulgare L.	Modern Cultivar	Australia
C121	Zaoshu 3	Hordeum vulgare L.	Modern Cultivar	China
C122	TL43	Hordeum vulgare L.	Mutant of Triumph	Germany
C123	Trimph	Hordeum vulgare L.	Modern Cultivar	Germany
C124	Golden Promis	Hordeum vulgare L.	Modern Cultivar	UK
C125	Tadmor	Hordeum vulgare L.	Modern Cultivar	Syria
C126	Franklin	Hordeum vulgare L.	Modern Cultivar	Australia
C127	Amagi Nijo	Hordeum vulgare L.	Modern Cultivar	Japan
C128	Jouzou Nijo	Hordeum vulgare L.	Modern Cultivar	Japan
C129	Pudamai 7	Hordeum vulgare L.	Modern Cultivar	China
C130	Pudamai 10	Hordeum vulgare L.	Modern Cultivar	China
C131	Hua 30	Hordeum vulgare L.	Modern Cultivar	China
C132	Qingyuanwumangluodamai	Hordeum vulgare L.	Landrace	China
C133	Zheda 8	Hordeum vulgare L.	Modern Cultivar	China
C134	Xinpi 1	Hordeum vulgare L.	Modern Cultivar	China
C135	Zangqing 320	Hordeum vulgare L.	Modern Cultivar	China
C136	Mexico 103	Hordeum vulgare L.	Modern Cultivar	Mexico
C137	Zheda 9	Hordeum vulgare L.	Modern Cultivar	China
C138	Dayton	Hordeum vulgare L.	Modern Cultivar	UK
C139	W6nk2	Hordeum vulgare L.	Modern Cultivar	UK
C140	Yangzhoudamai	Hordeum vulgare L.	Landrace	China
C141	Xiaojiang	Hordeum vulgare L.	Landrace	China
C142	Mikamogold	Hordeum vulgare L.	Modern Cultivar	Japan
C143	Asahi 19	Hordeum vulgare L.	Modern Cultivar	Japan
C144	Baijingerleng	Hordeum vulgare L.	Landrace	China
C145	Kirin Nao 1	Hordeum vulgare L.	Modern Cultivar	Japan
C146	Sapporo Shin 1	Hordeum vulgare L.	Modern Cultivar	Japan
C147	Zheyuanguan B47	Hordeum vulgare L.	Landrace	China
C148	Zhoumai 1	Hordeum vulgare L.	Modern Cultivar	China
C149	Chaoxiao	Hordeum vulgare L.	Landrace	China
C150	Yishandamai	Hordeum vulgare L.	Landrace	China
C151	Haiandamai	Hordeum vulgare L.	Landrace	China
C152	Nihon Gaosoi	Hordeum vulgare L.	Landrace	Japan
C153	Camlinue	Hordeum vulgare L.	Modern Cultivar	UK
C154	Mazulka	Hordeum vulgare L.	Modern Cultivar	UK
C155	Delisa	Hordeum vulgare L.	Modern Cultivar	UK
C156	Aooy	Hordeum vulgare L.	Modern Cultivar	UK
C157	Nanjiangerleng	Hordeum vulgare L.	Landrace	China
C158	CAW465	Hordeum vulgare L.	Modern Cultivar	Australia
C159	CAW265	Hordeum vulgare L.	Modern Cultivar	Australia
C160	Yuyaonuodamai	Hordeum vulgare L.	Landrace	China
C161	Yiwuerleng	Hordeum vulgare L.	Landrace	China
C162	91-74	Hordeum vulgare L.	Breeding/research material	China
C163	81-18	Hordeum vulgare L.	Breeding/research material	China
C164	Nihon Nijo 2	Hordeum vulgare L.	Modern Cultivar	Japan
C165	Yan 75-21	Hordeum vulgare L.	Breeding/research material	China
C166	Yan 66	Hordeum vulgare L.	Breeding/research material	China
C167	Fuxuan 48	Hordeum vulgare L.	Breeding/research material	China
C168	Ea52	Hordeum vulgare L.	Modern Cultivar	Japan
C169	Misatogold	Hordeum vulgare L.	Modern Cultivar	Japan
C170	Shirimasen	Hordeum vulgare L.	Modern Cultivar	Japan
C171	Nihon 133	Hordeum vulgare L.	Modern Cultivar	Japan
C172	Gang 2	Hordeum vulgare L.	Modern Cultivar	China
C173	Golden Thorpe	Hordeum vulgare L.	Modern Cultivar	UK
C174	Shang 86-166	Hordeum vulgare L.	Breeding/research material	China
C175	Guangmangerleng	Hordeum vulgare L.	Modern Cultivar	China
C176	Hu 1154	Hordeum vulgare L.	Modern Cultivar	China
C177	Haizi 2	Hordeum vulgare L.	Modern Cultivar	China
C178	Clipper	Hordeum vulgare L.	Modern Cultivar	Australia
C179	SSSG	Hordeum vulgare L.	Modern Cultivar	Australia
C180	Pisuibo	Hordeum vulgare L.	Modern Cultivar	Japan
C181	Adzuma Kogane	Hordeum vulgare L.	Modern Cultivar	Japan
C182	Zshikoka Hadaka	Hordeum vulgare L.	Modern Cultivar	Japan
C183	Langkazibai	Hordeum vulgare L.	Landrace	China
C184	Gaoyuanzao 1	Hordeum vulgare L.	Modern Cultivar	China
C185	Mishima Hadaka	Hordeum vulgare L.	Modern Cultivar	Japan
C186	Bandamai	Hordeum vulgare L.	Landrace	China
C187	Dan 95168	Hordeum vulgare L.	Breeding/research material	China
C188	Xiu 79-2	Hordeum vulgare L.	Breeding/research material	China
C189	Tiantaibaisileng	Hordeum vulgare L.	Landrace	China
C190	Anjiluomangmaodamai	Hordeum vulgare L.	Landrace	China
C191	Morex	Hordeum vulgare L.	Modern Cultivar	USA
C192	Paphitico	Hordeum vulgare L.	Landrace	Cyprus
C193	Dabuz	Hordeum vulgare L.	Landrace	Syria
C194	Arabi Aswad IG 33094	Hordeum vulgare L.	Landrace	Syria
C195	Belogorskij	Hordeum vulgare L.	Modern Cultivar	Russian Federation
C196	Cyclon	Hordeum vulgare L.	Modern Cultivar	Russian Federation
C197	Skorohod	Hordeum vulgare L.	Modern Cultivar	Russian Federation
C198	Astrachan	Hordeum vulgare L.	Modern Cultivar	Russian Federation
C199	Ägyptische Zweizeilige	Hordeum vulgare L.	Modern Cultivar	Egypt
C200	Karind Glattgrannig	Hordeum vulgare L.	Modern Cultivar	Iran
C201	Luxor	Hordeum vulgare L.	Modern Cultivar	Egypt
C202	Subergaljan	Hordeum vulgare L.	Modern Cultivar	Iraq
C203	Arkadij	Hordeum vulgare L.	Modern Cultivar	Jordan
C204	HOR 6938	Hordeum vulgare L.	Landrace	Iraq
C205	HOR 6955	Hordeum vulgare L.	Landrace	Iraq
C206	HOR 7419	Hordeum vulgare L.	Landrace	Egypt
C207	HOR 7427	Hordeum vulgare L.	Breeding/research material	Israel
C208	HOR 8257	Hordeum vulgare L.	Landrace	Iraq
C209	HOR 10484	Hordeum vulgare L.	Landrace	Iraq
C210	HOR 10604	Hordeum vulgare L.	Landrace	Iraq
C211	HOR 10615	Hordeum vulgare L.	Landrace	Iraq
C212	HOR 10625	Hordeum vulgare L.	Landrace	Iraq
C213	Emel Dschemal	Hordeum vulgare L.	Landrace	Israel
C214	Palaestina 3	Hordeum vulgare L.	Landrace	Israel
C215	Shemiran	Hordeum vulgare L.	Landrace	Iran
C216	Ghuchan	Hordeum vulgare L.	Landrace	Iran
C217	Miani	Hordeum vulgare L.	Landrace	Iran
C218	Esfahan	Hordeum vulgare L.	Landrace	Iran
C219	Syrische NR.59	Hordeum vulgare L.	Breeding/research material	Syria
C220	Durani	Hordeum vulgare L.	Modern Cultivar	Israel
C221	Jerusalem	Hordeum vulgare L.	Landrace	Israel
C222	Palaestina Frueh	Hordeum vulgare L.	Landrace	Israel
C223	Palaestina 12	Hordeum vulgare L.	Landrace	Israel
C224	Palaestina Rotgestreift	Hordeum vulgare L.	Landrace	Israel
C225	Israel 46	Hordeum vulgare L.	Landrace	Israel
C226	Israel 264	Hordeum vulgare L.	Landrace	Israel
C227	Palaestina 14	Hordeum vulgare L.	Landrace	Israel
C228	Aus Luxor	Hordeum vulgare L.	Landrace	Egypt
C229	Aegyptische Braugerste	Hordeum vulgare L.	Landrace	Egypt
C230	Insel Cypern	Hordeum vulgare L.	Landrace	Cyprus
C231	Oberaegyptische Sommergerste	Hordeum vulgare L.	Landrace	Egypt
C232	ICARDA 61 SP, P	Hordeum vulgare L.	Landrace	Syria
C233	Aegyptische Zweizeilige	Hordeum vulgare L.	Landrace	Egypt
C234	Fruehe Palaest. Gerste	Hordeum vulgare L.	Landrace	Israel
C235	Samarische Sommergerste	Hordeum vulgare L.	Landrace	Israel
C236	Omer	Hordeum vulgare L.	Landrace	Israel
C237	ICARDA 41 E	Hordeum vulgare L.	Landrace	Syria
W1	ECI-station2-gen14	Hordeum spontaneum	Wild barley	Isreal
W2	ECI-station2-gen16	Hordeum spontaneum	Wild barley	Isreal
W3	ECI-station2-gen18	Hordeum spontaneum	Wild barley	Isreal
W4	ECI-station6-gen4	Hordeum spontaneum	Wild barley	Isreal
W5	Wb-NE-6-station6	Hordeum spontaneum	Wild barley	Isreal
W6	YS20	Hordeum spontaneum	Wild barley	China
W7	YS25	Hordeum spontaneum	Wild barley	China
W8	YS27	Hordeum spontaneum	Wild barley	China
W9	YS39	Hordeum spontaneum	Wild barley	China
W10	YS45	Hordeum spontaneum	Wild barley	China
W11	YS54	Hordeum spontaneum	Wild barley	China
W12	YS55	Hordeum spontaneum	Wild barley	China
W13	YS56	Hordeum spontaneum	Wild barley	China
W14	YS58	Hordeum spontaneum	Wild barley	China
W15	YS59	Hordeum spontaneum	Wild barley	China
W16	YS62	Hordeum spontaneum	Wild barley	China
W17	XZ1	Hordeum spontaneum	Wild barley	China
W18	XZ2	Hordeum spontaneum	Wild barley	China
W19	XZ3	Hordeum spontaneum	Wild barley	China
W20	XZ4	Hordeum spontaneum	Wild barley	China
W21	XZ5	Hordeum spontaneum	Wild barley	China
W22	XZ6	Hordeum spontaneum	Wild barley	China
W23	XZ7	Hordeum spontaneum	Wild barley	China
W24	XZ8	Hordeum spontaneum	Wild barley	China
W25	XZ9	Hordeum spontaneum	Wild barley	China
W26	XZ10	Hordeum spontaneum	Wild barley	China
W27	XZ11	Hordeum spontaneum	Wild barley	China
W28	XZ12	Hordeum spontaneum	Wild barley	China
W29	XZ13	Hordeum spontaneum	Wild barley	China
W30	XZ14	Hordeum spontaneum	Wild barley	China
W31	XZ15	Hordeum spontaneum	Wild barley	China
W32	XZ16	Hordeum spontaneum	Wild barley	China
W33	XZ17	Hordeum spontaneum	Wild barley	China
W34	XZ18	Hordeum spontaneum	Wild barley	China
W35	XZ20	Hordeum spontaneum	Wild barley	China
W36	XZ21	Hordeum spontaneum	Wild barley	China
W37	XZ22	Hordeum spontaneum	Wild barley	China
W38	XZ23	Hordeum spontaneum	Wild barley	China
W39	XZ24	Hordeum spontaneum	Wild barley	China
W40	XZ25	Hordeum spontaneum	Wild barley	China
W41	XZ26	Hordeum spontaneum	Wild barley	China
W42	XZ27	Hordeum spontaneum	Wild barley	China
W43	XZ28	Hordeum spontaneum	Wild barley	China
W44	XZ29	Hordeum spontaneum	Wild barley	China
W45	XZ30	Hordeum spontaneum	Wild barley	China
W46	XZ31	Hordeum spontaneum	Wild barley	China
W47	XZ32	Hordeum spontaneum	Wild barley	China
W48	XZ33	Hordeum spontaneum	Wild barley	China
W49	XZ34	Hordeum spontaneum	Wild barley	China
W50	XZ35	Hordeum spontaneum	Wild barley	China
W51	XZ37	Hordeum spontaneum	Wild barley	China
W52	XZ38	Hordeum spontaneum	Wild barley	China
W53	XZ39	Hordeum spontaneum	Wild barley	China
W54	XZ40	Hordeum spontaneum	Wild barley	China
W55	XZ42	Hordeum spontaneum	Wild barley	China
W56	XZ43	Hordeum spontaneum	Wild barley	China
W57	XZ44	Hordeum spontaneum	Wild barley	China
W58	XZ45	Hordeum spontaneum	Wild barley	China
W59	XZ46	Hordeum spontaneum	Wild barley	China
W60	XZ47	Hordeum spontaneum	Wild barley	China
W61	XZ48	Hordeum spontaneum	Wild barley	China
W62	XZ49	Hordeum spontaneum	Wild barley	China
W63	XZ50	Hordeum spontaneum	Wild barley	China
W64	XZ51	Hordeum spontaneum	Wild barley	China
W65	XZ52	Hordeum spontaneum	Wild barley	China
W66	XZ53	Hordeum spontaneum	Wild barley	China
W67	XZ54	Hordeum spontaneum	Wild barley	China
W68	XZ55	Hordeum spontaneum	Wild barley	China
W69	XZ56	Hordeum spontaneum	Wild barley	China
W70	XZ57	Hordeum spontaneum	Wild barley	China
W71	XZ58	Hordeum spontaneum	Wild barley	China
W72	XZ59	Hordeum spontaneum	Wild barley	China
W73	XZ60	Hordeum spontaneum	Wild barley	China
W74	XZ61	Hordeum spontaneum	Wild barley	China
W75	XZ62	Hordeum spontaneum	Wild barley	China
W76	XZ63	Hordeum spontaneum	Wild barley	China
W77	XZ64	Hordeum spontaneum	Wild barley	China
W78	XZ65	Hordeum spontaneum	Wild barley	China
W79	XZ66	Hordeum spontaneum	Wild barley	China
W80	XZ67	Hordeum spontaneum	Wild barley	China
W81	XZ68	Hordeum spontaneum	Wild barley	China
W82	XZ69	Hordeum spontaneum	Wild barley	China
W83	XZ70	Hordeum spontaneum	Wild barley	China
W84	XZ71	Hordeum spontaneum	Wild barley	China
W85	XZ72	Hordeum spontaneum	Wild barley	China
W86	XZ74	Hordeum spontaneum	Wild barley	China
W87	XZ75	Hordeum spontaneum	Wild barley	China
W88	XZ77	Hordeum spontaneum	Wild barley	China
W89	XZ78	Hordeum spontaneum	Wild barley	China
W90	XZ81	Hordeum spontaneum	Wild barley	China
W91	XZ82	Hordeum spontaneum	Wild barley	China
W92	XZ83	Hordeum spontaneum	Wild barley	China
W93	XZ85	Hordeum spontaneum	Wild barley	China
W94	XZ86	Hordeum spontaneum	Wild barley	China
W95	XZ87	Hordeum spontaneum	Wild barley	China
W96	XZ88	Hordeum spontaneum	Wild barley	China
W97	XZ89	Hordeum spontaneum	Wild barley	China
W98	XZ90	Hordeum spontaneum	Wild barley	China
W99	XZ91	Hordeum spontaneum	Wild barley	China
W100	XZ92	Hordeum spontaneum	Wild barley	China
W101	XZ93	Hordeum spontaneum	Wild barley	China
W102	XZ94	Hordeum spontaneum	Wild barley	China
W103	XZ95	Hordeum spontaneum	Wild barley	China
W104	XZ96	Hordeum spontaneum	Wild barley	China
W105	XZ97	Hordeum spontaneum	Wild barley	China
W106	XZ98	Hordeum spontaneum	Wild barley	China
W107	XZ99	Hordeum spontaneum	Wild barley	China
W108	XZ100	Hordeum spontaneum	Wild barley	China
W109	XZ101	Hordeum spontaneum	Wild barley	China
W110	XZ102	Hordeum spontaneum	Wild barley	China
W111	XZ103	Hordeum spontaneum	Wild barley	China
W112	XZ104	Hordeum spontaneum	Wild barley	China
W113	XZ105	Hordeum spontaneum	Wild barley	China
W114	XZ106	Hordeum spontaneum	Wild barley	China
W115	XZ107	Hordeum spontaneum	Wild barley	China
W116	XZ108	Hordeum spontaneum	Wild barley	China
W117	XZ109	Hordeum spontaneum	Wild barley	China
W118	XZ110	Hordeum spontaneum	Wild barley	China
W119	XZ111	Hordeum spontaneum	Wild barley	China
W120	XZ112	Hordeum spontaneum	Wild barley	China
W121	XZ113	Hordeum spontaneum	Wild barley	China
W122	XZ115	Hordeum spontaneum	Wild barley	China
W123	XZ116	Hordeum spontaneum	Wild barley	China
W124	XZ117	Hordeum spontaneum	Wild barley	China
W125	XZ118	Hordeum spontaneum	Wild barley	China
W126	XZ119	Hordeum spontaneum	Wild barley	China
W127	XZ120	Hordeum spontaneum	Wild barley	China
W128	XZ121	Hordeum spontaneum	Wild barley	China
W129	XZ122	Hordeum spontaneum	Wild barley	China
W130	XZ123	Hordeum spontaneum	Wild barley	China
W131	XZ124	Hordeum spontaneum	Wild barley	China
W132	XZ125	Hordeum spontaneum	Wild barley	China
W133	XZ126	Hordeum spontaneum	Wild barley	China
W134	XZ127	Hordeum spontaneum	Wild barley	China
W135	XZ128	Hordeum spontaneum	Wild barley	China
W136	XZ129	Hordeum spontaneum	Wild barley	China
W137	XZ130	Hordeum spontaneum	Wild barley	China
W138	XZ131	Hordeum spontaneum	Wild barley	China
W139	XZ132	Hordeum spontaneum	Wild barley	China
W140	XZ133	Hordeum spontaneum	Wild barley	China
W141	XZ134	Hordeum spontaneum	Wild barley	China
W142	XZ135	Hordeum spontaneum	Wild barley	China
W143	XZ136	Hordeum spontaneum	Wild barley	China
W144	XZ137	Hordeum spontaneum	Wild barley	China
W145	XZ139	Hordeum spontaneum	Wild barley	China
W146	XZ140	Hordeum spontaneum	Wild barley	China
W147	XZ141	Hordeum spontaneum	Wild barley	China
W148	XZ142	Hordeum spontaneum	Wild barley	China
W149	XZ143	Hordeum spontaneum	Wild barley	China
W150	XZ144	Hordeum spontaneum	Wild barley	China
W151	XZ145	Hordeum spontaneum	Wild barley	China
W152	XZ146	Hordeum spontaneum	Wild barley	China
W153	XZ147	Hordeum spontaneum	Wild barley	China
W154	XZ149	Hordeum spontaneum	Wild barley	China
W155	XZ150	Hordeum spontaneum	Wild barley	China
W156	XZ151	Hordeum spontaneum	Wild barley	China
W157	XZ152	Hordeum spontaneum	Wild barley	China
W158	XZ153	Hordeum spontaneum	Wild barley	China
W159	XZ154	Hordeum spontaneum	Wild barley	China
W160	XZ155	Hordeum spontaneum	Wild barley	China
W161	XZ156	Hordeum spontaneum	Wild barley	China
W162	XZ157	Hordeum spontaneum	Wild barley	China
W163	XZ158	Hordeum spontaneum	Wild barley	China
W164	XZ159	Hordeum spontaneum	Wild barley	China
W165	XZ160	Hordeum spontaneum	Wild barley	China
W166	XZ161	Hordeum spontaneum	Wild barley	China
W167	XZ162	Hordeum spontaneum	Wild barley	China
W168	XZ163	Hordeum spontaneum	Wild barley	China
W169	XZ164	Hordeum spontaneum	Wild barley	China
W170	XZ165	Hordeum spontaneum	Wild barley	China
W171	XZ166	Hordeum spontaneum	Wild barley	China
W172	XZ167	Hordeum spontaneum	Wild barley	China
W173	XZ169	Hordeum spontaneum	Wild barley	China
W174	XZ170	Hordeum spontaneum	Wild barley	China
W175	XZ171	Hordeum spontaneum	Wild barley	China
W176	XZ172	Hordeum spontaneum	Wild barley	China
W177	XZ173	Hordeum spontaneum	Wild barley	China
W178	XZ174	Hordeum spontaneum	Wild barley	China
W179	XZ176	Hordeum spontaneum	Wild barley	China
W180	XZ177	Hordeum spontaneum	Wild barley	China
W181	XZ178	Hordeum spontaneum	Wild barley	China
W182	XZ179	Hordeum spontaneum	Wild barley	China
W183	XZ180	Hordeum spontaneum	Wild barley	China
W184	XZ182	Hordeum spontaneum	Wild barley	China
W185	XZ184	Hordeum spontaneum	Wild barley	China
W186	XZ185	Hordeum spontaneum	Wild barley	China
W187	XZ186	Hordeum spontaneum	Wild barley	China
W188	XZ187	Hordeum spontaneum	Wild barley	China
W189	XZ188	Hordeum spontaneum	Wild barley	China
W190	XZ189	Hordeum spontaneum	Wild barley	China
