# Supplementary material for: Screening of Worldwide Barley Collection for Drought Tolerance: The Assessment of Various Physiological Measures as the Selection Criteria
Source: Front Plant Sci. 2020 Jul 29;11:1159. doi: 10.3389/fpls.2020.01159 (PMC7403471; doi:10.3389/fpls.2020.01159)
Supplement: Supplemental Table S2 — Detailed information of barley genotypes in four clusters. [file Table_2.xlsx]

## Sheet: Cluster information
Cluster I	Cluster II	Cluster III	Cluster IV
W94	W22	C228	C191
W5	W86	C221	C229
W58	W84	C25	W7
W115	W29	C190	W74
W183	W24	C91	W77
W158	W90	C20	C69
W38	W32	C213	C123
W156	W87	C226	C85
W174	C54	C83	C235
W72	C212	C231	C107
W16	W34		C94
W179	W40		C68
W63	W18		C183
W182	C124		C128
W127	W79		C120
W189	C62		C199
W186	W109		C168
W66	W83		C141
W181	W37		C78
W21	W17		C87
W35	W88		C220
W107	C118		C236
W140	C193		C233
W142	W85		C207
W180	W33		C166
W13	C198		C58
W75	W80		C174
W14	W78		C119
W144	W81		C131
W15	C95		C178
W164	C43		C10
W147	C110		C56
C115	W95		C73
W76	C122		C70
W23	C159		C22
W157	C51		C3
W71	W96		C133
W166	W91		C109
W39	W93		C65
W146	W4		C74
W141	W92		C72
W45	W30		C9
	W152		C23
	W131		C21
	W118		C152
	W99		C66
	W44		C136
	W165		C145
	W162		C173
	W101		C151
	W97		C176
	W12		C13
	W117		C57
	W105		C130
	W48		C146
	W119		C161
	W70		C113
	C125		C18
	W31		C64
	W103		C104
	W82		C105
	W124		C175
	W106		C16
	W114		C144
	W120		C67
	W155		C39
	W110		C76
	W113		C37
	W19		C157
	W59		C117
	W123		C216
	W57		C187
	W65		C188
	W177		C6
	W112		C206
	W160		C2
	W170		C186
	W89		C227
	W68		C4
	W56		C108
	W126		C194
	W184		C143
	W52		C142
	W143		C169
	W111		C139
	W47		C14
	W150		C200
	W145		C218
	W134		C184
	W25		C134
	W20		W1
	W133		C53
	W135		C29
	W159		C99
	W136		C7
	W132		C179
	W128		C137
	W43		C203
	W148		C79
	W51		C155
	C112		C162
	C211		C100
	C126		C114
	W167		C35
	W149		C96
	C8		C42
	C63		C210
	C223		C15
	W137		C163
	W108		C93
	W139		C32
	W53		C102
	W60		C45
	W42		C208
	W50		W8
	W172		C36
	W100		C40
	W36		C50
			C44
			C150
			C232
			C189
			C140
			C89
			C192
			W129
			W154
			W41
			W176
			W122
			W138
			W64
			C52
			C5
			C26
			C234
			C71
			C41
			C61
			C17
			C19
			C48
			W2
			C214
			C202
			W6
			W49
			W185
			W10
			W171
			W102
			W11
			W168
			W9
			W190
			W188
			C88
			C103
			C171
			C132
			C224
			C225
			C75
			C97
			C31
			C33
			C49
			C47
			C156
			C230
			C148
			C1
			C24
			C160
			W46
			W104
			W27
			W54
			W69
			W130
			W169
			W178
			W62
			W116
			W98
			W161
			W61
			W175
			W121
			W187
			C138
			W55
			W3
			W151
			C237
			C182
			C185
			C28
			C195
			C201
			C177
			C181
			C205
			C80
			C12
			C219
			C204
			C59
			W173
			C82
			C55
			C38
			C98
			C90
			C27
			C116
			C121
			C165
			C106
			C147
			C101
			W73
			C34
			C30
			C77
			C84
			C81
			C135
			W67
			C217
			C222
			C111
			W153
			C154
			C92
			C164
			C167
			C215
			C149
			C11
			W26
			W125
			C158
			W163
			W28
			C60
			C170
			C129
			C172
			C209
			C153
			C180
			C127
			C86
			C46
			C196
			C197
