# Supplementary material for: Screening of Worldwide Barley Collection for Drought Tolerance: The Assessment of Various Physiological Measures as the Selection Criteria
Source: Front Plant Sci. 2020 Jul 29;11:1159. doi: 10.3389/fpls.2020.01159 (PMC7403471; doi:10.3389/fpls.2020.01159)
Supplement: Supplemental Table S3 — Performance of the selected 18 barley genotypes in the experiment of screening. [file Table_3.xlsx]

## Sheet: Performance of 18 genotypes
	Accession number	Accession name	PEGRFW	PEGRDW	PEGRWC	WDRFW	WDRDW	WDRWC	Cluster category
Sensitive	C137	ZJU 9	-0.538919	-0.337138	-0.0617763	-0.701925	-0.452429	-0.157628	IV
	C173	Golden Thorpe	-0.647071	-0.380215	-0.0974655	-0.615654	-0.299975	-0.129976	IV
	C186	Bandamai	-0.711775	-0.390119	-0.123938	-0.734667	-0.24093	-0.274507	IV
	C190	Anjiluomangmaodamai	-0.668175	-0.39206	-0.0906466	-0.808135	-0.504516	-0.242906	III
	W46	XZ31	-0.472032	-0.265185	-0.0525294	-0.480828	-0.353143	-0.0414227	IV
	W67	XZ54	-0.489079	-0.311496	-0.0461197	-0.53501	-0.244171	-0.0891783	IV
	W73	XZ60	-0.459085	-0.283727	-0.0416754	-0.476185	-0.271283	-0.0671135	IV
	W130	XZ123	-0.422093	-0.256399	-0.043031	-0.459509	-0.321415	-0.0439978	IV
	W153	XZ147	-0.477218	-0.203509	-0.0676473	-0.43416	-0.199205	-0.0671389	IV
Tolerant	C112	Kashima Ōmugi	-0.319535	-0.0923243	-0.0397769	-0.299678	-0.0743738	-0.0513705	II
	C115	Wumangliuleng	-0.151976	-0.0552461	-0.0174892	-0.242578	-0.0161578	-0.00933883	I
	C118	Ganpi 1	-0.375131	-0.131773	-0.0603133	-0.30199	-0.0528003	-0.0473708	IV
	C191	Morex	-0.3882	-0.186003	-0.0358048	-0.202504	-0.0569745	-0.062523	IV
	W20	XZ4	-0.233342	-0.0493733	-0.0920879	-0.200427	-0.0319569	-0.0314065	I
	W76	XZ63	-0.139897	-0.0289691	-0.0151278	-0.159699	-0.0359024	-0.0251622	I
	W147	XZ141	-0.0152744	-0.00622568	-0.003062	-0.178149	-0.0930184	-0.0213905	I
	W157	XZ152	-0.201887	-0.0794442	-0.0178219	-0.178115	-0.0312953	-0.0296565	I
	W186	XZ185	-0.0890744	-0.0557525	-0.00682802	-0.254821	-0.188959	-0.0171877	I
